# Supplementary material for: EBI2 receptor regulates myelin development and inhibits LPC-induced demyelination
Source: Springer Nature journal article supplement (doi:10.1186/s12974-017-1025-0), 2017-12-01

# Supplemental Figure 1

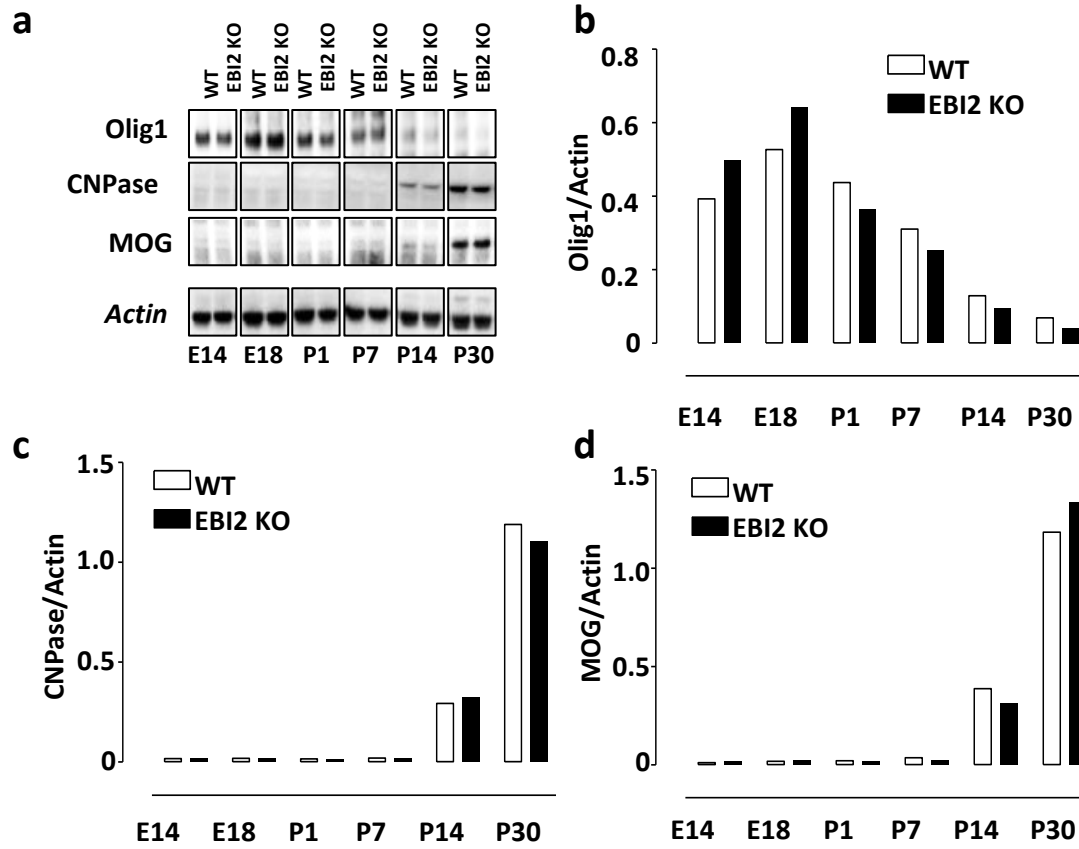

Supplement: MOESM1 [file 15311068]
